# Supplementary material for: Electrocatalytic hydrogen evolution mediated by an organotelluroxane macrocycle stabilized through secondary interactions
Source: Royal Society of Chemistry journal article supplement (doi:10.1039/d3dt02746e), 2023-01-01
Supplement: d3dt02746e1.pdf [file d3dt02746e1.pdf]

## **Electrocatalytic Hydrogen Evolution Mediated by an Organotelluroxane Macrocycle Stabilized through Secondary Interactions**

Gujju Narsimhulu<sup>a</sup>, Calvin Samuel<sup>a</sup>, Sathishkumar Palani<sup>b</sup>, Sai Hemant Kumar Dasari<sup>a</sup>, Kothandam Krishnamoorthy<sup>b\*</sup>, Viswanathan Baskar<sup>a,\*</sup>

<sup>a</sup>School of Chemistry, University of Hyderabad, Hyderabad 500046, Telangana, India. E-mail: [vbsc@uohyd.ac.in](mailto:vbsc@uohyd.ac.in)

<sup>b</sup>Polymer Science and Engineering Division, CSIR-National Laboratory, Dr. Homi Bhabha Road, Pune- 411008, India

## Table of contents

| Section | Contents                                                                                                                 | Page    |
|---------|--------------------------------------------------------------------------------------------------------------------------|---------|
| 1       | Crystallographic information of compounds 2-5                                                                            | S4-S5   |
| 2       | ORTEP diagram of compound 2                                                                                              | S5      |
| 3-3.1   | Te-F (BF <sub>4</sub> ) interaction distances and Bond lengths and bond angles for compound 2                            | S5-S6   |
| 4-5     | Cyclic voltammetry and bulky electrolysis and H <sub>2</sub> calculation                                                 | S6-S9   |
| 6       | ESI mass spectral analysis of compound 2                                                                                 | S10     |
| 7       | <sup>125</sup> Te, <sup>19</sup> F, <sup>11</sup> B, <sup>1</sup> H, <sup>13</sup> C NMR spectral analysis of compound 2 | S11-S13 |
| 8       | Powder XRD data and FT-IR spectral analysis of compound 2                                                                | S13-S14 |
| 9       | EDAX spectrum and elemental analysis of compound 2                                                                       | S14-S15 |
| 10      | ORTEP diagram of compound 3                                                                                              | S15     |
| 11      | Te-O (perchlorate) interaction distances of compound 3                                                                   | S16     |
| 12      | Bond lengths and bond angles of compound 3                                                                               | S16     |
| 13      | ESI mass spectral analysis of compound 3                                                                                 | S17-S18 |
| 14      | <sup>1</sup> H, <sup>13</sup> C NMR spectral analysis of compound 3                                                      | S19     |
| 15      | Powder and FT-IR spectral analysis of compound 3                                                                         | S20     |
| 16      | EDAX spectrum and elemental analysis of compound 3                                                                       | S21     |
| 17      | ORTEP diagram of compound 4                                                                                              | S22     |
| 18      | Te-F (BF <sub>4</sub> ) interaction distances, bond lengths and bond angles of compound 4                                | S22     |
| 19      | ESI mass spectral analysis of compound 4                                                                                 | S23     |
| 20      | <sup>125</sup> Te, <sup>19</sup> F, <sup>11</sup> B, <sup>1</sup> H, <sup>13</sup> C NMR spectral analysis of compound 4 | S24-S26 |
| 21      | Powder and FT-IR spectral analysis of compound 4                                                                         | S27     |
| 22      | EDAX spectrum and elemental analysis of compound 4                                                                       | S28     |
| 23      | ORTEP diagram of compound 5                                                                                              | S29     |
| 24      | Te-O (perchlorate) interaction distances, bond lengths and bond angles of compound 5                                     | S29     |
| 25      | ESI mass spectral analysis of compound 5                                                                                 | S30     |

|           |                                                       |         |
|-----------|-------------------------------------------------------|---------|
| <b>26</b> | <sup>125</sup> Te NMR spectral analysis of compound 5 | S31     |
| <b>27</b> | Powder and FT-IR spectral analysis of compound 5      | S31-S32 |
| <b>28</b> | EDAX spectrum and elemental analysis of compound 5    | S32-S33 |
| <b>29</b> | Bond valence Sum calculation                          | S34-S36 |

## Section – 1: Crystallographic information of compounds 2-5

**Table S1.** Crystallographic information of compounds 2-5.

|                                             | C <sub>56</sub> H <sub>56</sub> B <sub>4</sub> F <sub>16</sub> O <sub>10</sub> Te <sub>4</sub> | C <sub>56</sub> H <sub>56</sub> Cl <sub>4</sub> O <sub>26</sub> Te <sub>4</sub> | C <sub>21</sub> H <sub>21</sub> BF <sub>4</sub> O <sub>3</sub> Te | C <sub>21</sub> H <sub>21</sub> ClO <sub>7</sub> Te  |
|---------------------------------------------|------------------------------------------------------------------------------------------------|---------------------------------------------------------------------------------|-------------------------------------------------------------------|------------------------------------------------------|
| F.wt g/mol <sup>-1</sup>                    | 1746.65                                                                                        | 1797.24                                                                         | 535.79                                                            | 548.43                                               |
| T, K                                        | 100.0(2)                                                                                       | 100.0(2)                                                                        | 106(9)                                                            | 285                                                  |
| Crystal system                              | Monoclinic                                                                                     | Monoclinic                                                                      | Triclinic                                                         | Triclinic                                            |
| Space group (number)                        | <i>P</i> <sub>2</sub> <sub>1</sub> / <i>c</i> (14)                                             | <i>P</i> <sub>2</sub> <sub>1</sub> / <i>c</i> (14)                              | <i>P</i> -1 (2)                                                   | <i>P</i> -1 (2)                                      |
| Crystal size mm <sup>3</sup>                | 0.32 × 0.25 × 0.16                                                                             | 0.1 × 0.08 × 0.08                                                               | 0.8 × 0.12 × 0.1                                                  | 0.09 × 0.08 × 0.06                                   |
| a, Å                                        | 17.0516(2)                                                                                     | 17.1420(1)                                                                      | 10.2455(2)                                                        | 10.3196(4)                                           |
| b, Å                                        | 17.0082(3)                                                                                     | 17.2042(1)                                                                      | 10.5162(2)                                                        | 10.7682(5)                                           |
| c, Å                                        | 26.0700(4)                                                                                     | 26.0805(2)                                                                      | 10.9830(2)                                                        | 11.1672(5)                                           |
| α, deg                                      | 90                                                                                             | 90                                                                              | 110.245(2)                                                        | 111.398(1)                                           |
| β, deg                                      | 97.065(1)                                                                                      | 97.420(1)                                                                       | 97.955(1)                                                         | 96.830(1)                                            |
| γ, deg                                      | 90                                                                                             | 90                                                                              | 104.283(1)                                                        | 104.125(1)                                           |
| V, Å <sup>3</sup>                           | 7503.2(2)                                                                                      | 7627.13(9)                                                                      | 1042.82(4)                                                        | 1090.36(8)                                           |
| Z                                           | 4                                                                                              | 4                                                                               | 2                                                                 | 2                                                    |
| D <sub>calcd</sub> Mg/m <sup>3</sup>        | 1.720                                                                                          | 1.735                                                                           | 1.706                                                             | 1.670                                                |
| μ, mm <sup>-1</sup>                         | 1.635                                                                                          | 1.734                                                                           | 1.482                                                             | 1.526                                                |
| F(000)                                      | 3800.0                                                                                         | 3924.0                                                                          | 528.0                                                             | 544.0                                                |
| Theta range, deg                            | 3.72 to 49.998                                                                                 | 3.94 to 53.874                                                                  | 4.078 to 53.924                                                   | 5.878 to 61.102                                      |
| Index ranges                                | -20 ≤ h ≤ 20<br>-20 ≤ k ≤ 20<br>-30 ≤ l ≤ 30                                                   | -21 ≤ h ≤ 21<br>-21 ≤ k ≤ 21<br>-32 ≤ l ≤ 32                                    | -13 ≤ h ≤ 13<br>-13 ≤ k ≤ 13<br>-13 ≤ l ≤ 13                      | -14 ≤ h ≤ 14<br>-15 ≤ k ≤ 15<br>-15 ≤ l ≤ 15         |
| Total reflns                                | 67629                                                                                          | 80531                                                                           | 15561                                                             | 58169                                                |
| Ind. reflns / R(int)                        | 13201/0.0817                                                                                   | 15871/0.0230                                                                    | 4326/0.0318                                                       | 6644/0.0298                                          |
| Data/restraints/parameters                  | 13201/0/954                                                                                    | 15871/0/954                                                                     | 4326/0/274                                                        | 6644/0/274                                           |
| Completeness to θ <sub>max</sub> , %        | 100                                                                                            | 96.1                                                                            | 95.4                                                              | 99.6                                                 |
| GooF( F <sup>2</sup> )                      | 1.040                                                                                          | 1.141                                                                           | 1.051                                                             | 1.043                                                |
| R <sub>1</sub> /wR <sub>2</sub> [I > 2σ(I)] | R <sub>1</sub> = 0.0594,<br>wR <sub>2</sub> = 0.1427                                           | R <sub>1</sub> = 0.0246,<br>wR <sub>2</sub> = 0.0521                            | R <sub>1</sub> = 0.0267,<br>wR <sub>2</sub> = 0.0597              | R <sub>1</sub> = 0.0223,<br>wR <sub>2</sub> = 0.0550 |

|                                                |                                     |                                     |                                     |                                     |
|------------------------------------------------|-------------------------------------|-------------------------------------|-------------------------------------|-------------------------------------|
| $R_1/wR_2$ [all data]                          | $R_1 = 0.0741$ ,<br>$wR_2 = 0.1499$ | $R_1 = 0.0266$ ,<br>$wR_2 = 0.0528$ | $R_1 = 0.0294$ ,<br>$wR_2 = 0.0610$ | $R_1 = 0.0281$ ,<br>$wR_2 = 0.0574$ |
| Largest diff peak/hole,<br>$e.\text{\AA}^{-3}$ | 3.36/-1.45                          | 1.28/-1.02                          | 1.30/-0.72                          | 0.44/-0.51                          |

## Section – 2: ORTEP diagram of compound 2

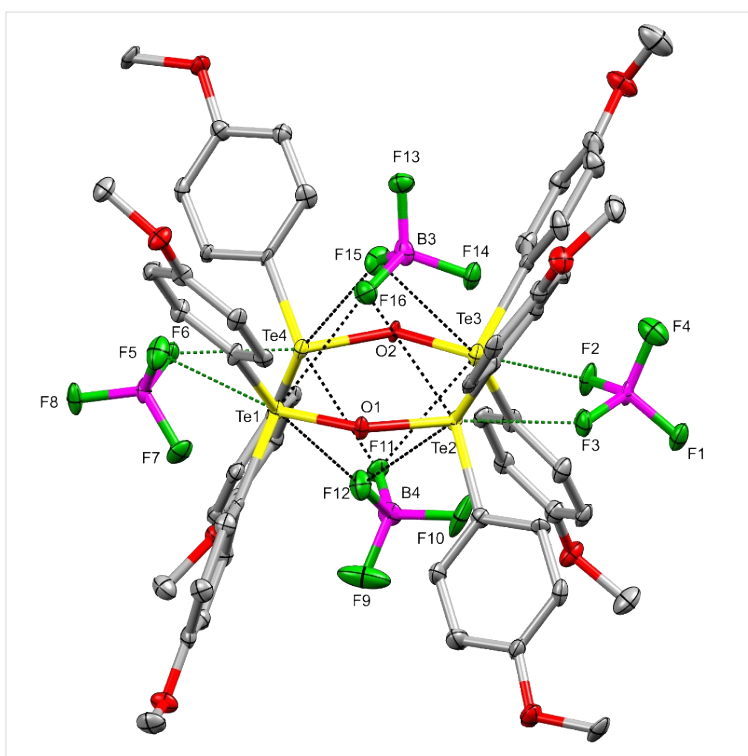

**Figure S1.** ORTEP diagram of **2**. The thermal ellipsoids are shown at a 40% probability level. Solvent molecule and all hydrogen atoms were omitted for clarity.

## Section – 3: Te-F ( $\text{BF}_4$ ) interaction distances of compound 2

**Table S2.** Bridging anion Interaction with Tellurium [ $\text{\AA}$ ].

|            |       |
|------------|-------|
| Te(1)-F(5) | 3.020 |
| Te(2)-F(3) | 2.640 |
| Te(3)-F(2) | 2.607 |
| Te(4)-F(6) | 2.620 |

**Table S3.** Capping anion Interaction with Tellurium [ $\text{\AA}$ ].

|             |       |
|-------------|-------|
| Te(1)-F(12) | 2.800 |
| Te(1)-F(16) | 2.890 |

|             |       |
|-------------|-------|
| Te(2)-F(12) | 2.940 |
| Te(2)-F(16) | 2.940 |
| Te(3)-F(15) | 3.080 |
| Te(3)-F(11) | 2.940 |
| Te(4)-F(11) | 2.840 |
| Te(4)-F(15) | 3.030 |

### Section – 3.1: Bond lengths and bond angles for compound 2

**Table S4.** Selected bond lengths [Å] and angles [°] for **2**.

|                  |          |
|------------------|----------|
| Te(1)-O(1)       | 1.940(4) |
| Te(2)-O(1)       | 1.960(4) |
| Te(3)-O(2)       | 1.960(4) |
| Te(4)-O(2)       | 1.950(4) |
| Te(1)-O(1)-Te(2) | 125.2(2) |
| Te(3)-O(2)-Te(4) | 122.2(2) |

### Section – 4: Cyclic voltammetry and bulky electrolysis

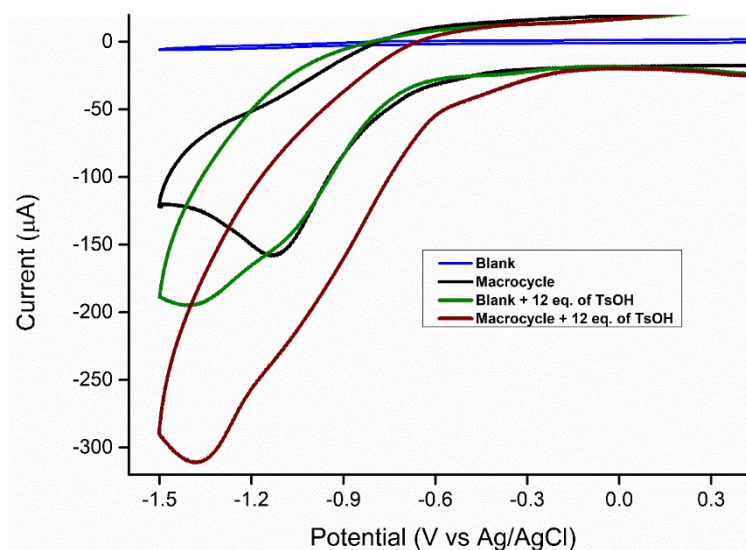

**Fig. S2.** Cyclic voltammogram of **Blank** (blue), **macrocycle 2** (black), blank with 12 eq. equivalents of para-Toluene sulfonic acid as a proton source, and Macrocycle 2 with 12 eq. of TsOH. Electrocatalytic conditions 1 mM of the **2** in acetonitrile in the presence of 100 mM TBAP as supporting electrolyte at a scan rate of 100 mV s<sup>-1</sup> in an inert atmosphere using a three-electrode configuration.

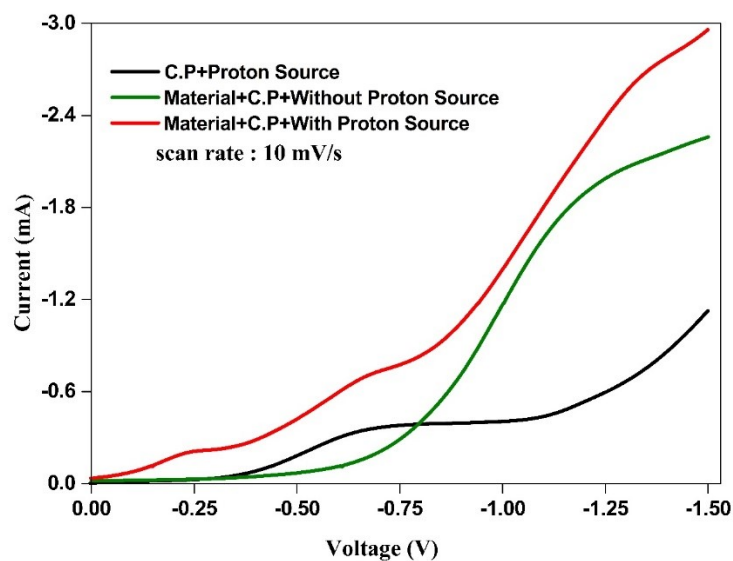

**Fig. S3:** (a) Linear sweep voltammetry of solution carbon paper (c.p) with proton source para-toluene sulfonic acid (black), macrocycle 2 (green), macrocycle 2 with proton source (red). Electrocatalytic conditions 1 mM of the macrocycle 2 in acetonitrile in the presence of 100 mM TBAP as supporting electrolyte at a scan rate of 10 mV s<sup>-1</sup> in an inert atmosphere using a homemade three-electrode configuration.

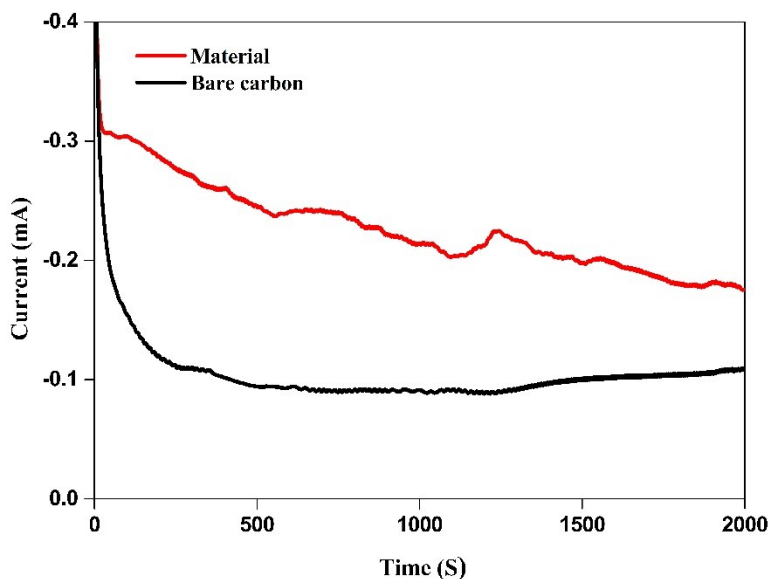

**Fig. S4:** Chronoamperometry profile of the same solution while holding the potential at -0.68 V vs Ag/Ag<sup>+</sup>.

## Section – 5: Homogeneous System H<sub>2</sub> calculation

$$H_2 = \frac{Area}{Slope} * 2 * empty\ volume$$

$$H_2 = \frac{12500}{22886976} * 2 * 10$$

$$H_2 = 0.01\ \mu\ mol$$

H<sub>2</sub> Slope calibration value = 22886976 μ mol

### Area % Report

Data File: E:\Sathish KK\Te 130423 HOMO  
 Method: C:\EZChrom Elite\Enterprise\Projects\Default\Method\sleep mode.met  
 Acquired: 4/13/2023 7:52:27 PM  
 Printed: 8/9/2023 10:49:34 AM

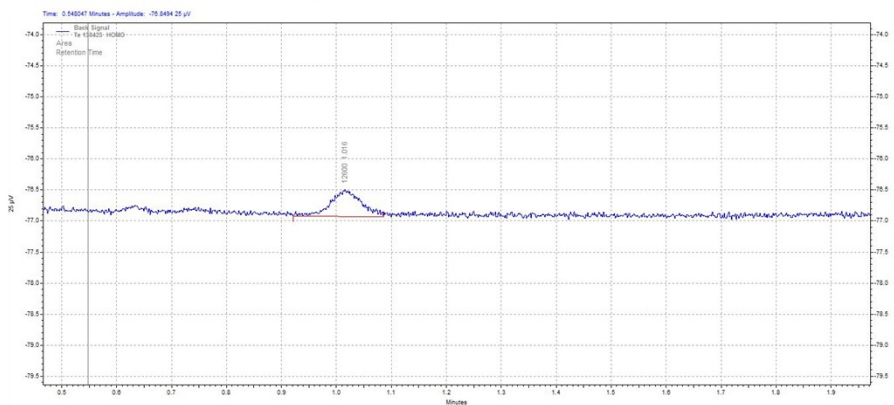

### Back Signal

#### Results

| Retention Time | Area  | Area % | Height | Height % |
|----------------|-------|--------|--------|----------|
| 1.016          | 12600 | 100.00 | 3272   | 100.00   |
| Totals         | 12600 | 100.00 | 3272   | 100.00   |

(a). HER activity for the tellurium complex in homogenous system



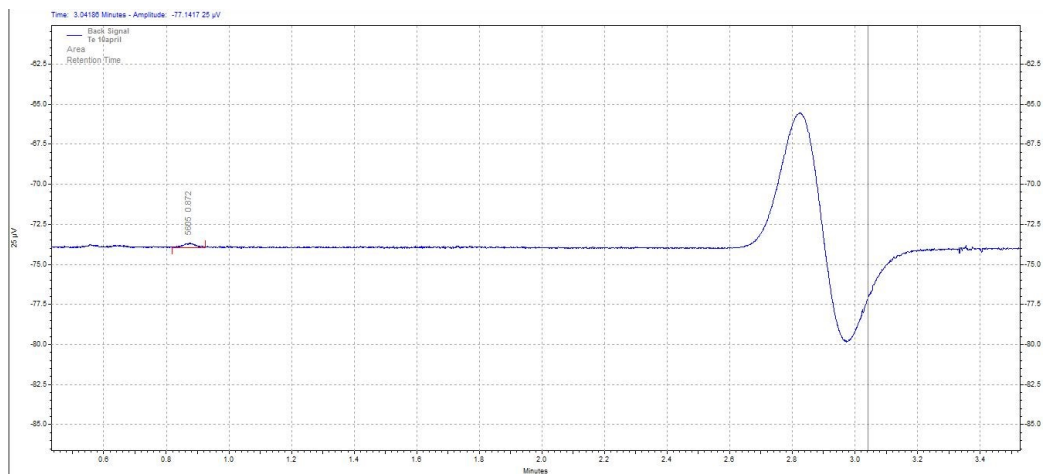

(b). HER activity for the tellurium complex in heterogeneous system

**Fig. S5.** (a) and (b) are gas chromatography of evolved  $H_2$  gas during bulk electrolysis in homogeneous and heterogeneous systems respectively

## Section – 6: ESI mass spectral analysis of compound 2

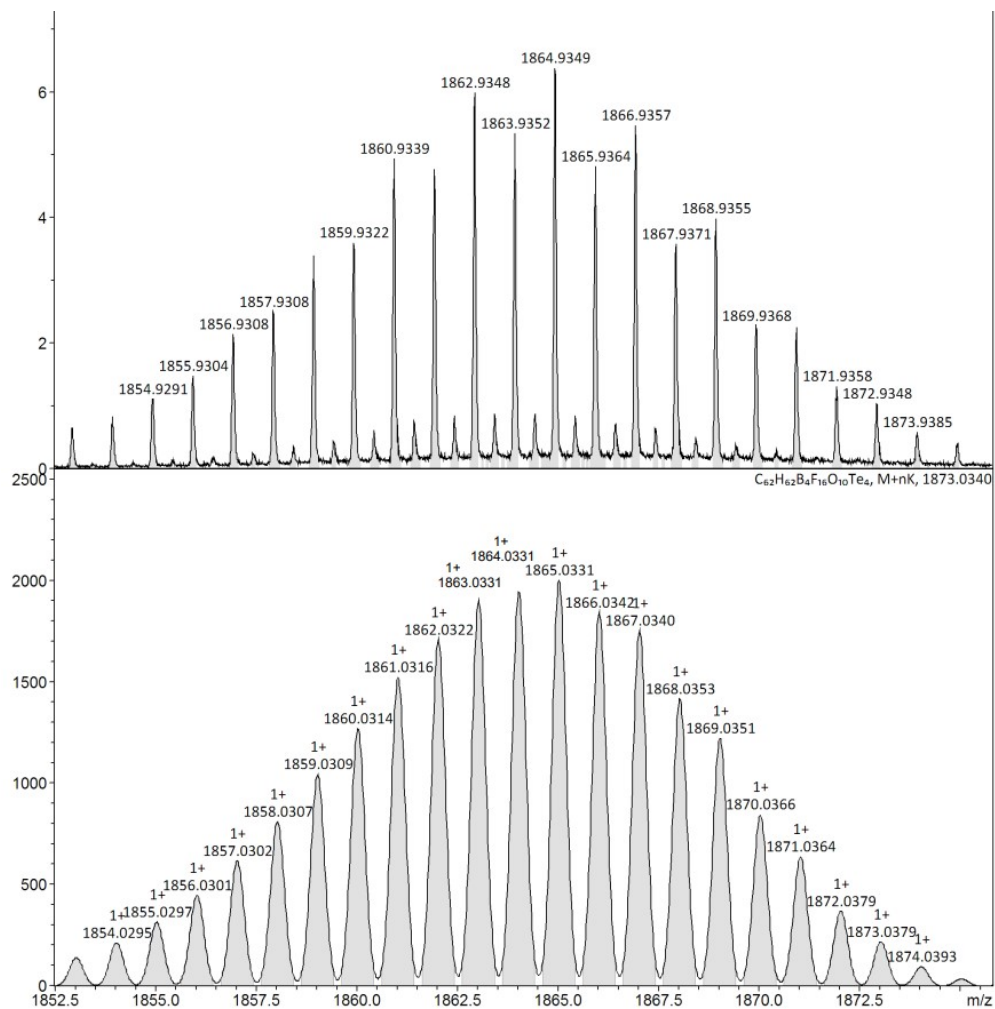

Fig. S6. ESI mass spectra of 2.

Section – 7:  $^{125}\text{Te}$ ,  $^{19}\text{F}$ ,  $^{11}\text{B}$ ,  $^1\text{H}$ ,  $^{13}\text{C}$  NMR spectral analysis of compound **2**

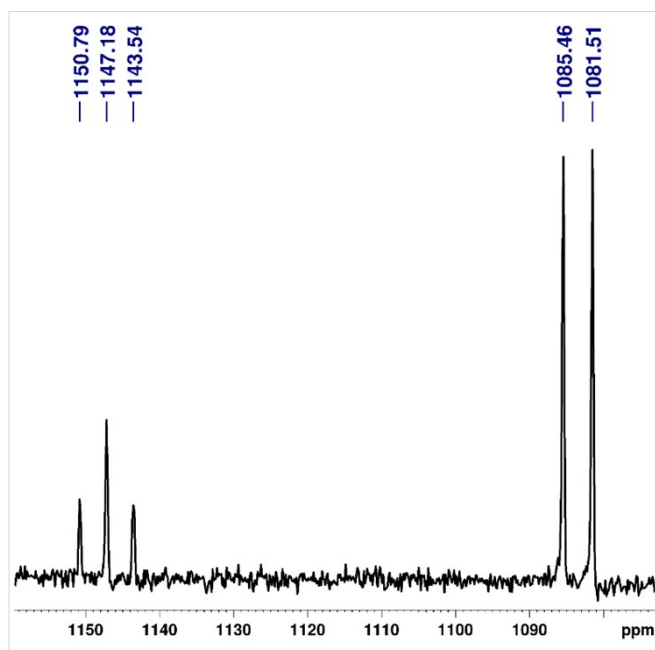

Fig. S7.  $^{125}\text{Te}$  NMR spectrum of **2** in  $\text{CDCl}_3$  at room temperature.

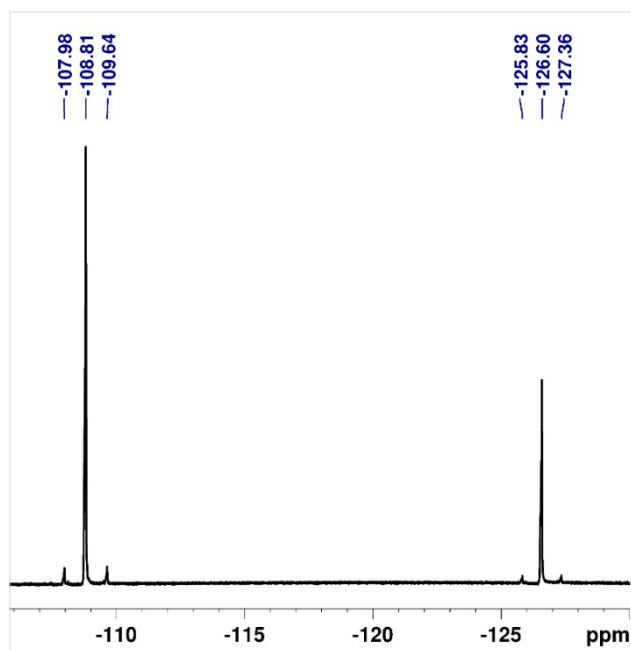

Fig. S8.  $^{19}\text{F}$  NMR spectrum of **2** in  $\text{CDCl}_3$  at room temperature.

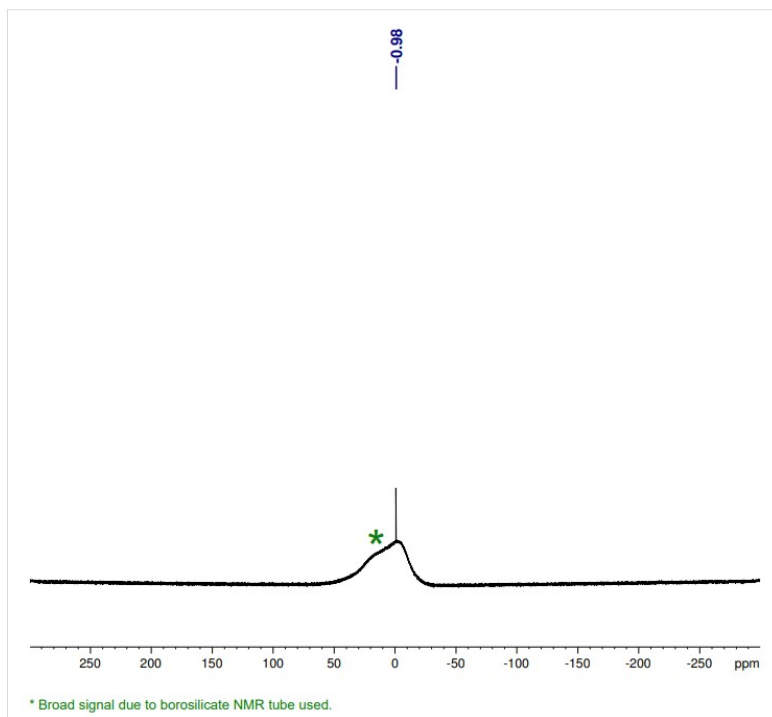

**Fig. S9.**  $^{11}\text{B}$  NMR spectrum of **2** in  $\text{CDCl}_3$  at room temperature.

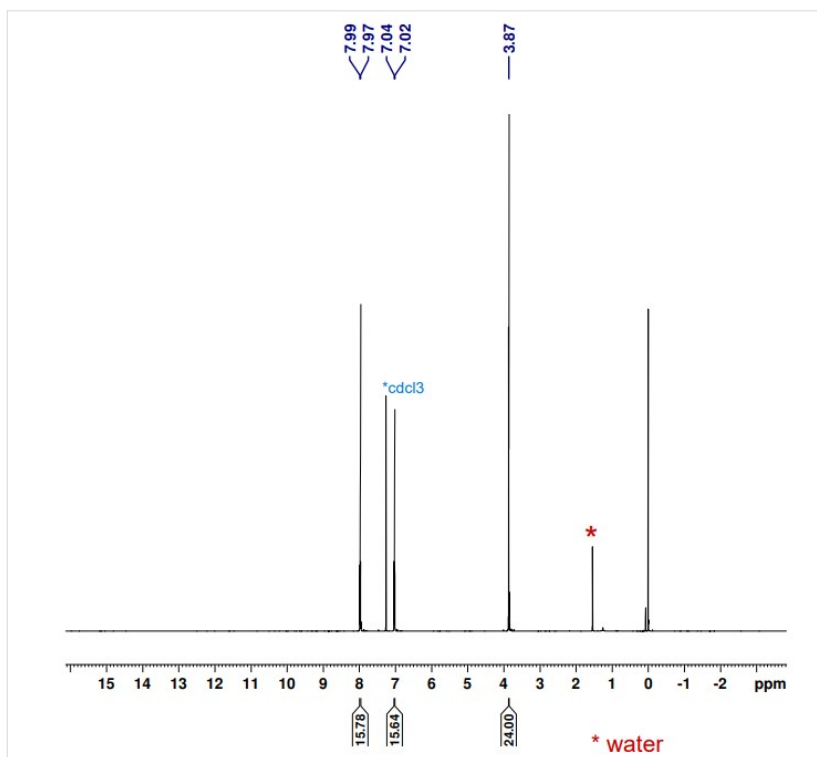

**Fig. S10.**  $^1\text{H}$  NMR spectrum of **2** in  $\text{CDCl}_3$  at room temperature.

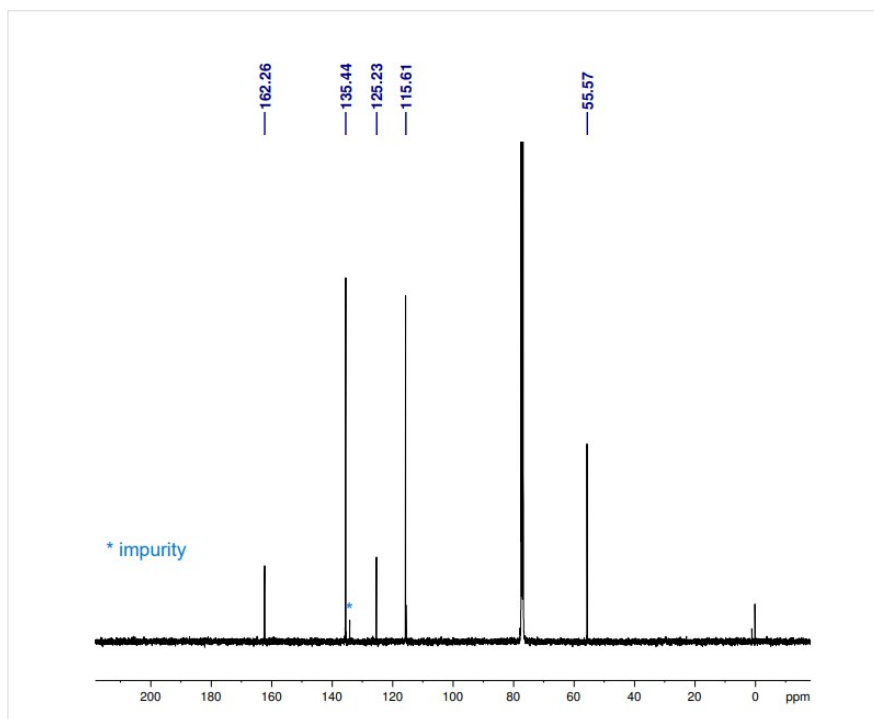

Fig. S11.  $^{13}\text{C}\{^1\text{H}\}$  NMR spectrum of **2** in  $\text{CDCl}_3$  at room temperature.

Section – 8: powder XRD data and FT-IR spectral analysis of compound **2**

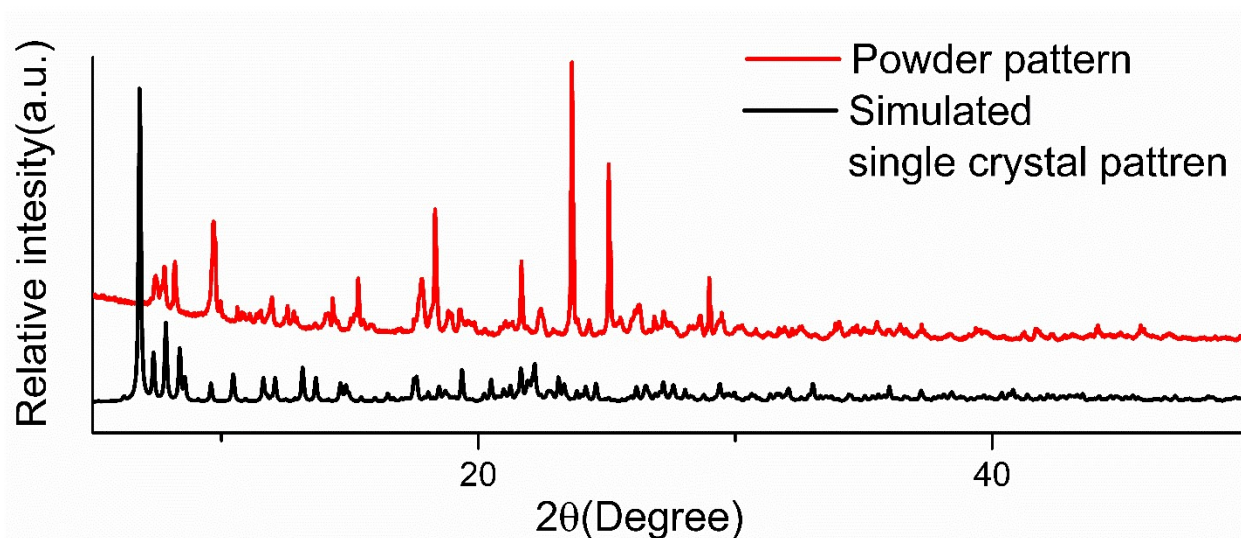

Fig. S12. Powder XRD-pattern for compound **2**.

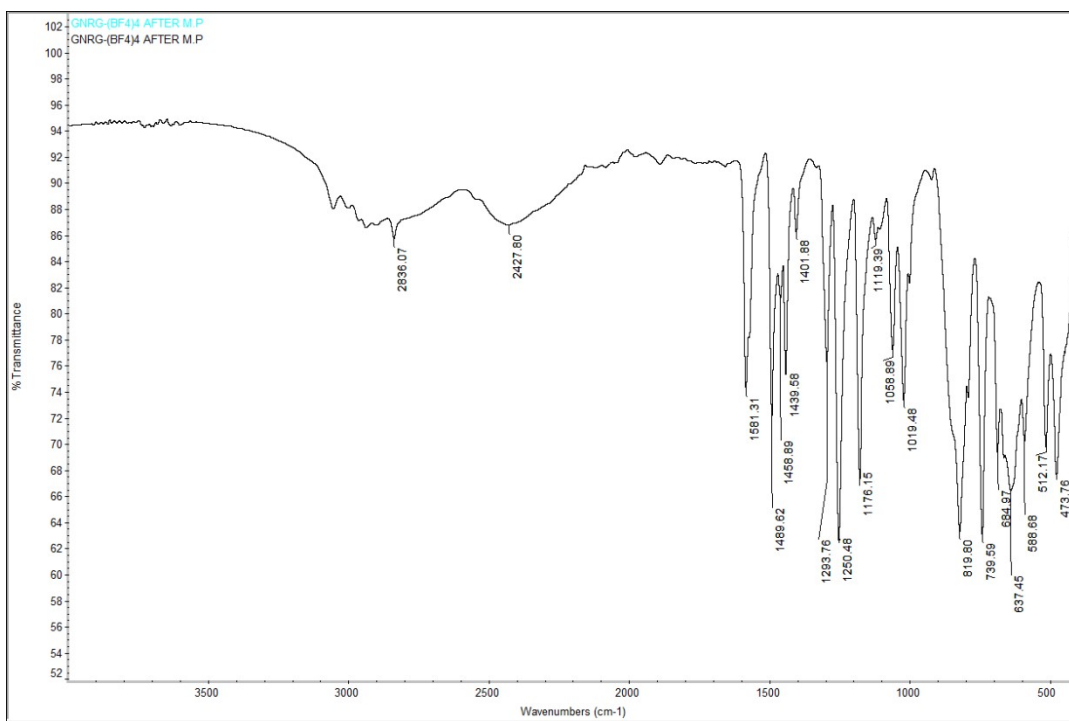

**Fig. S13.** FT-IR spectrum of compound 2.

**Section – 9: EDAX spectrum and elemental analysis for compound 2.**

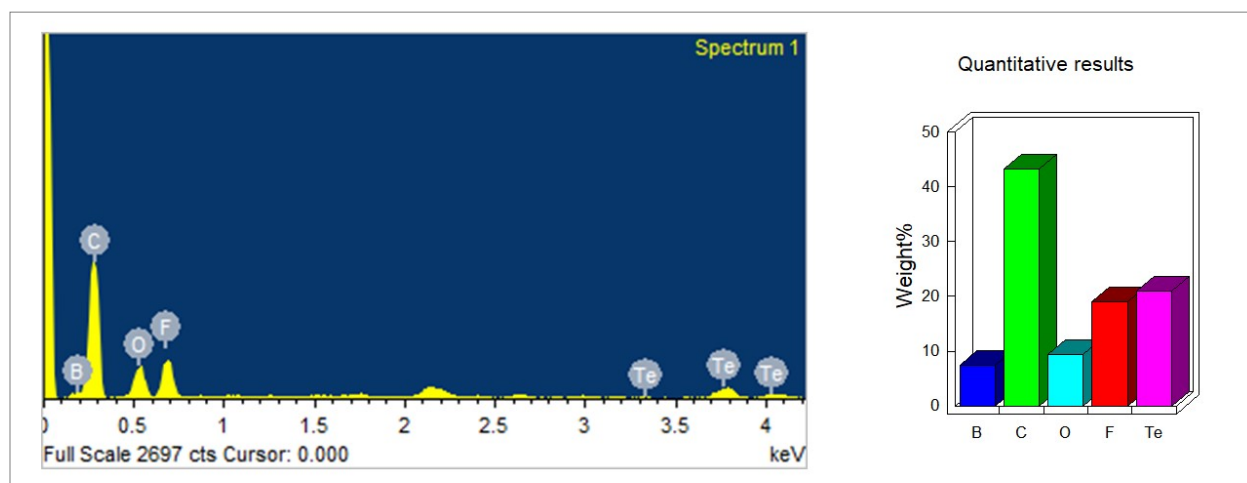

**Fig. S14.** EDAX spectrum of compound 2

| Element | Calculated Weight% | Measured weight% from EDAX analysis |
|---------|--------------------|-------------------------------------|
| B       | 2.48               | 3.32                                |
| C       | 38.51              | 42.58                               |
| O       | 9.16               | 9.80                                |
| F       | 17.40              | 18.95                               |
| Te      | 29.22              | 25.35                               |
| H       | 3.23               | Not detected                        |
|         | 100                | -----                               |

**Table S5.** EDAX elemental analysis of compound 2.

**Section – 10: ORTEP diagram of compound 3**

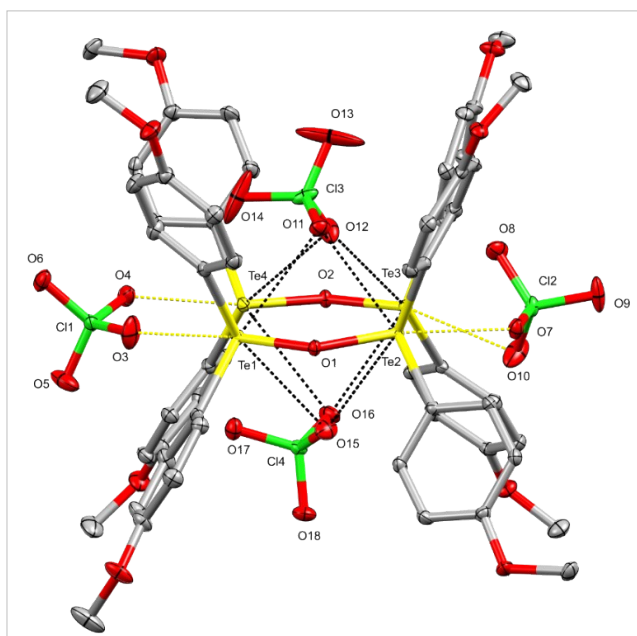

**Fig. S15.** ORTEP diagram of **3**. The thermal ellipsoids are shown at a 40% probability level. Solvent molecule and all hydrogen atoms were omitted for clarity.

## Section – 11: Te-O (perchlorate) interaction distances of compound 3

**Table S6.** Bridging anion (perchlorate) Interaction with Tellurium [Å].

|             | Distance in [Å] |
|-------------|-----------------|
| Te(1)-O(3)  | 2.658           |
| Te(2)-O(7)  | 2.636           |
| Te(3)-O(11) | 3.084           |
| Te(4)-O(4)  | 2.685           |

**Table S7.** Capping anion (perchlorate) Interaction with Tellurium [Å].

|             |       |
|-------------|-------|
| Te(1)-O(11) | 2.970 |
| Te(1)-O(15) | 3.100 |
| Te(2)-O(11) | 2.885 |
| Te(2)-O(15) | 3.085 |
| Te(2)-O(15) | 2.840 |
| Te(3)-O(16) | 2.912 |
| Te(4)-O(12) | 2.960 |
| Te(4)-O(16) | 3.080 |

## Section – 12: Bond lengths and bond angles of compound 3

**Table S8.** Selected bond lengths [Å] and angles [°] for 3.

|                  |            |
|------------------|------------|
| Te(1)-O(1)       | 1.9490(18) |
| Te(2)-O(1)       | 1.9602(17) |
| Te(3)-O(2)       | 1.9434(18) |
| Te(4)-O(2)       | 1.9680(17) |
| Te(1)-O(1)-Te(2) | 122.02(9)  |
| Te(3)-O(2)-Te(4) | 124.80(9)  |



Section – 13: ESI mass spectral analysis of compound 3

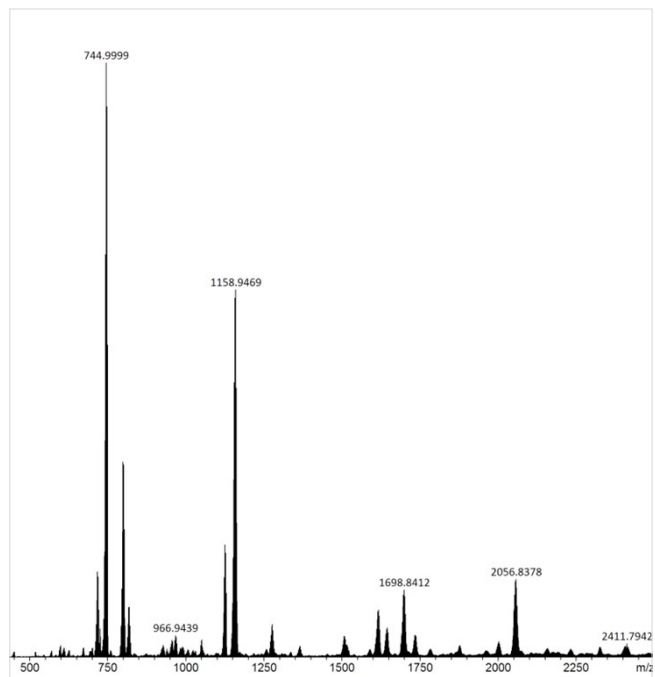

Fig. S16. ESI mass spectra of 3.

**Analysis Info**

Analysis Name D:\Data\2021-data\PROF VB\DEC\258.d  
Method tune\_low.m  
Sample Name 258  
Comment

Acquisition Date 12/21/2021 12:44:02 PM

Operator BDAL  
Instrument maXis 255552.10138

**Acquisition Parameter**

|             |            |                      |          |                  |           |
|-------------|------------|----------------------|----------|------------------|-----------|
| Source Type | ESI        | Ion Polarity         | Positive | Set Nebulizer    | 0.3 Bar   |
| Focus       | Not active | Set Capillary        | 3000 V   | Set Dry Heater   | 180 °C    |
| Scan Begin  | 50 m/z     | Set End Plate Offset | -500 V   | Set Dry Gas      | 4.0 l/min |
| Scan End    | 2500 m/z   | Set Charging Voltage | 0 V      | Set Divert Valve | Waste     |
|             |            | Set Corona           | 0 nA     | Set APCI Heater  | 0 °C      |

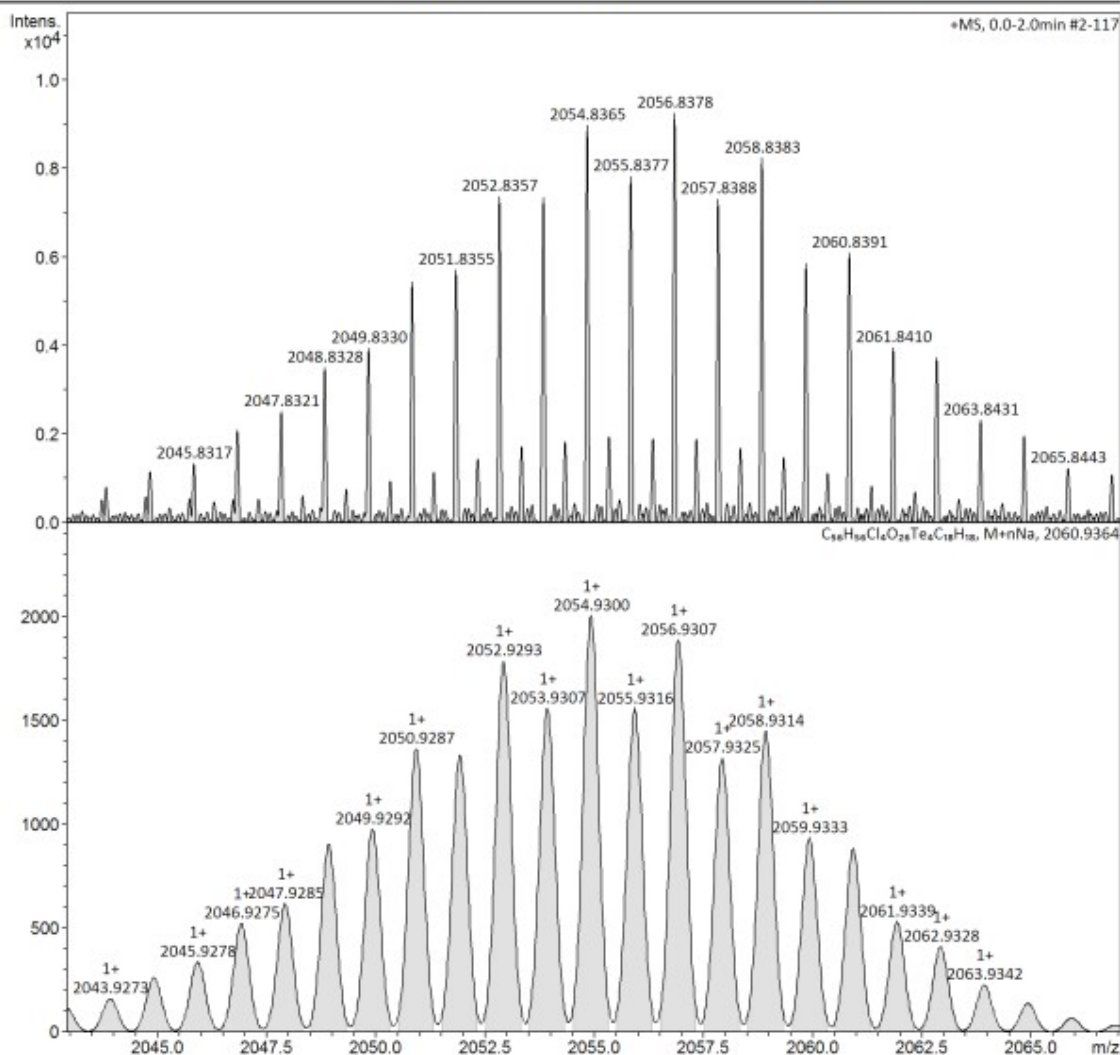

**Fig. S16a.** ESI mass spectra of **3** experimental above and simulated below

Section – 14:  $^1\text{H}$ ,  $^{13}\text{C}$  NMR spectral analysis of compound **3**

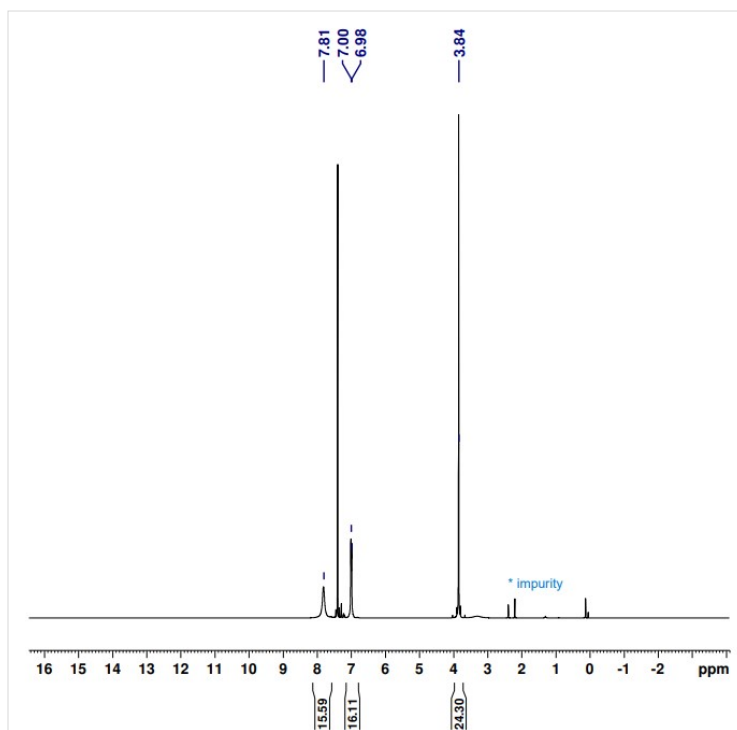

Fig. S17.  $^1\text{H}$  NMR spectrum of **3** in  $\text{CDCl}_3$  at room temperature.

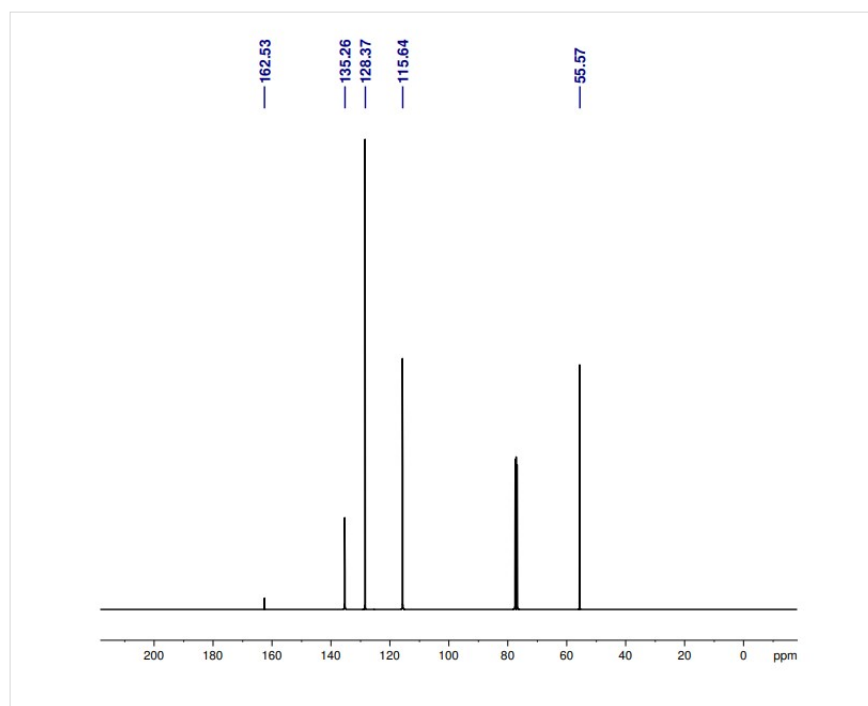

Fig. S18.  $^{13}\text{C}\{^1\text{H}\}$  NMR spectrum of **3** in  $\text{CDCl}_3$  at room temperature.

Section – 15: Powder and FT-IR spectral analysis of compound 3

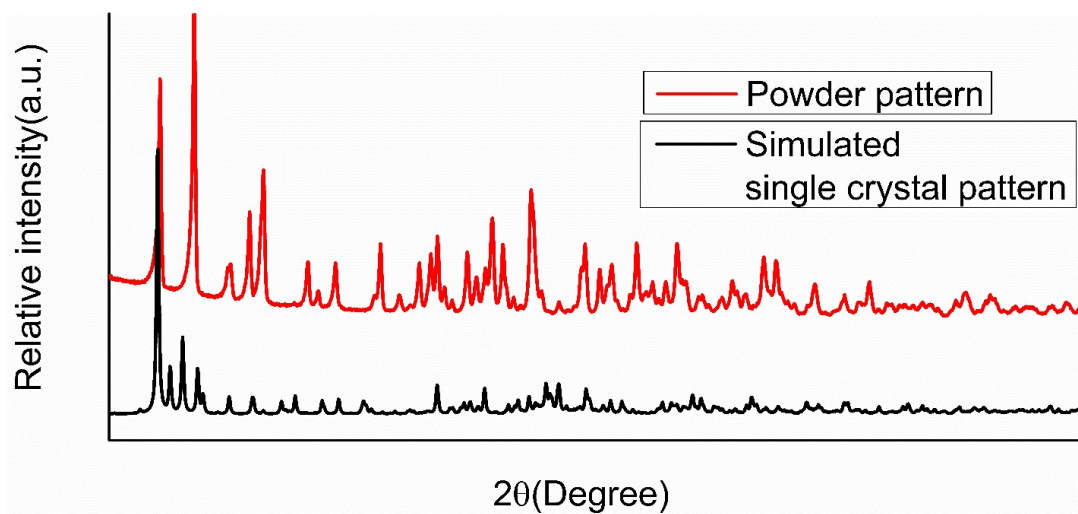

Fig. S19. Powder XRD-pattern for compound 3.

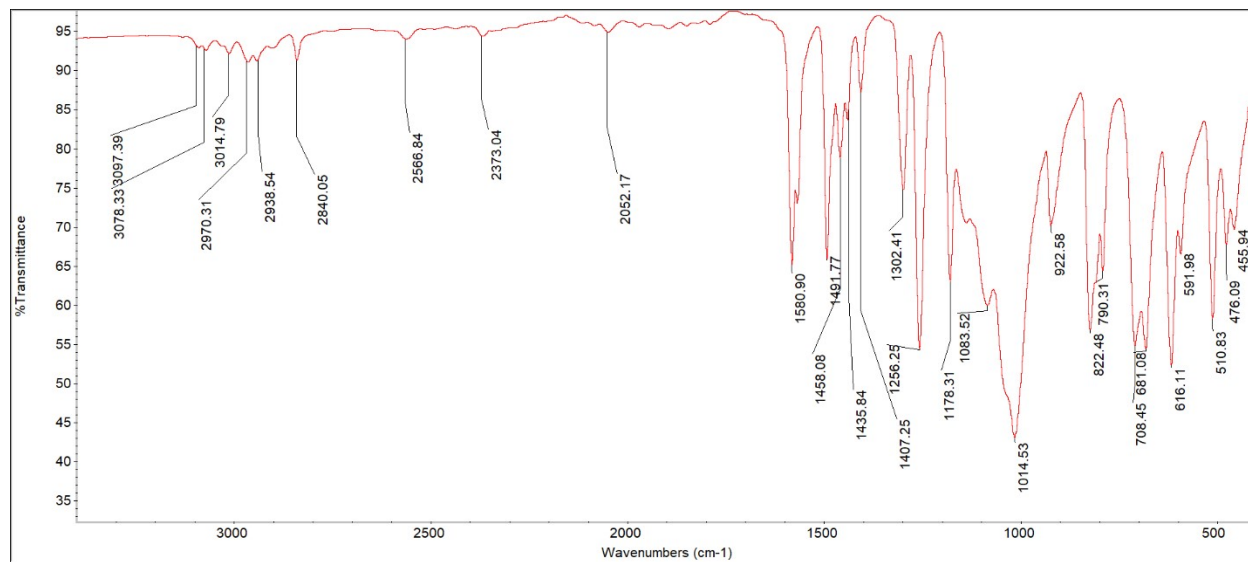

Fig. S20. FT-IR spectrum of compound 3.

Section – 16: EDAX spectrum and elemental analysis for compound 2.

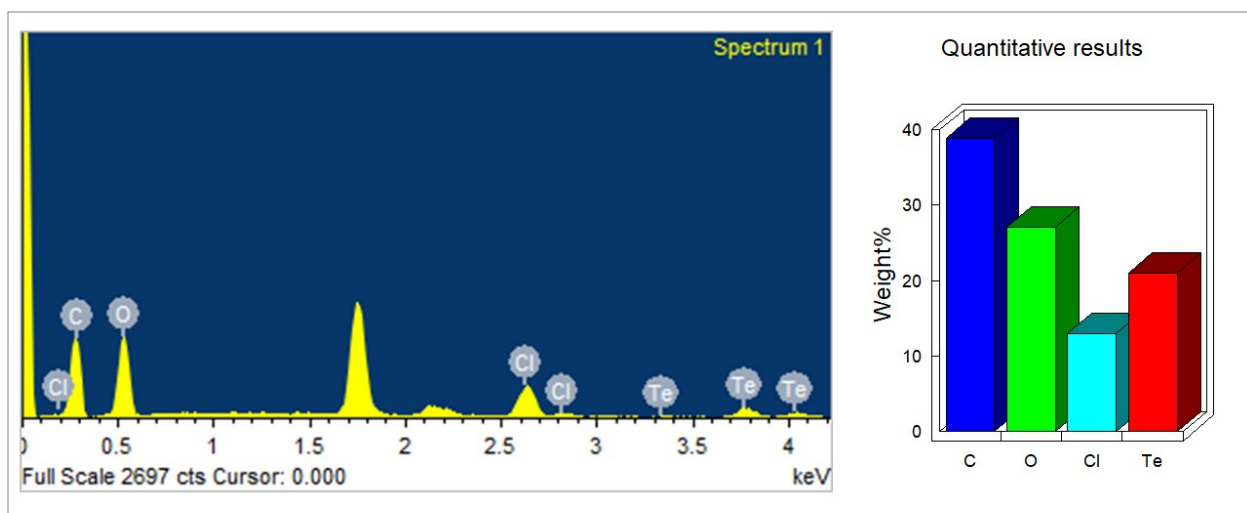

Fig. S21. EDAX spectrum of compound 3.

| Element | Calculated Weight% | Measured weight% from EDAX analysis |
|---------|--------------------|-------------------------------------|
| C       | 37.42              | 38.90                               |
| O       | 23.15              | 25.13                               |
| Cl      | 7.89               | 11.95                               |
| Te      | 28.40              | 24.02                               |
| H       | 3.14               | Not detected                        |
|         | 100                | -----                               |

Table S9. EDAX elemental analysis of compound 3.

## Section – 17: ORTEP diagram of compound 4

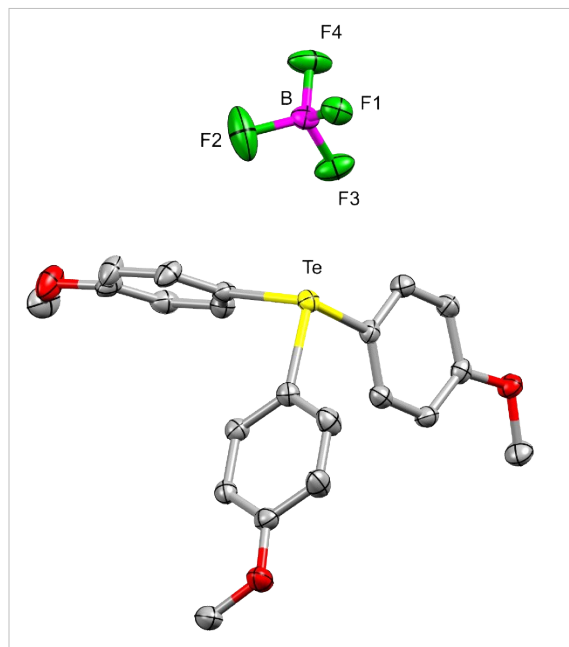

**Fig. S22.** ORTEP diagram of **4**. The thermal ellipsoids are shown at a 40% probability level. All hydrogen atoms omitted for clarity.

## Section – 18: Te-F (BF<sub>4</sub>) interaction distances, bond lengths and bond angles of compound 4

**Table S10.** Interaction [Å], Bond lengths [Å] and angles [°] for **4**.

|                  |           |
|------------------|-----------|
| Te(1)-F(1)       | 3.030     |
| Te(1)-C(1)       | 2.100(3)  |
| Te(1)-C(8)       | 2.100(3)  |
| Te(1)-C(15)      | 2.120(3)  |
| C(1)-Te(1)-C(8)  | 95.30(10) |
| C(1)-Te(1)-C(15) | 97.45(10) |
| C(8)-Te(1)-C(15) | 94.95(10) |

## Section – 19: ESI mass spectral analysis of compound 4

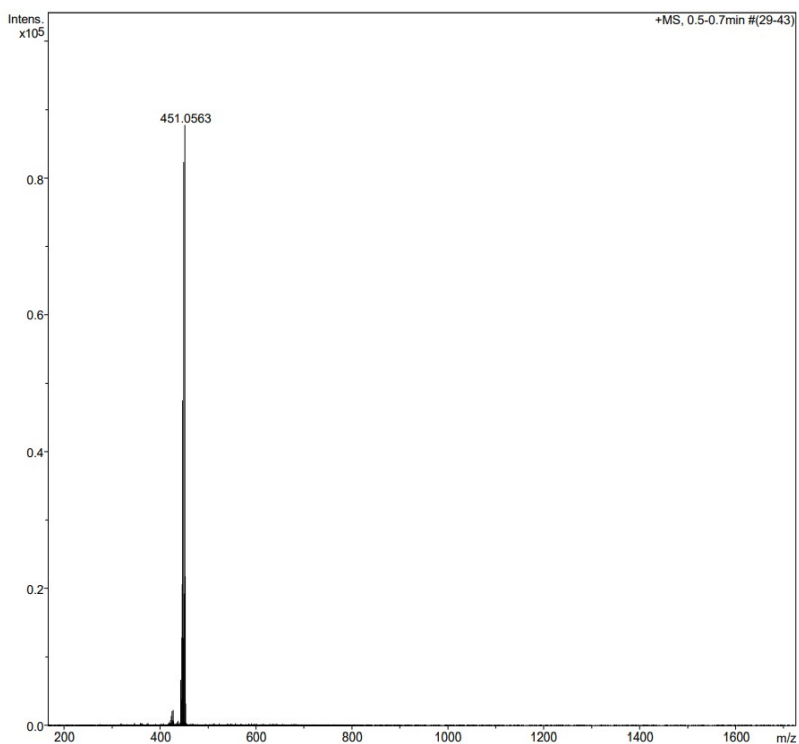

**Fig. S23.** ESI mass spectra of 4 (experimental)

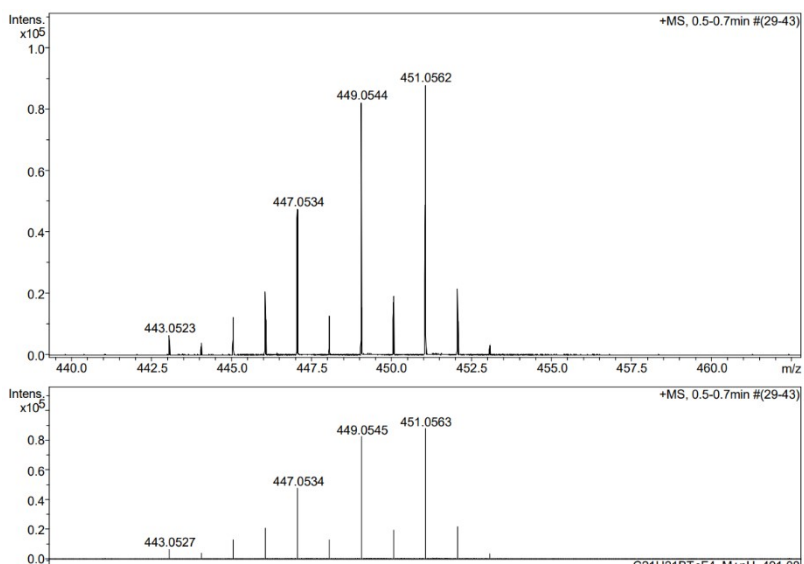

**Fig. S24.** ESI mass spectra of 4 experimental above and simulated below

Section – 20:  $^{125}\text{Te}$ ,  $^{19}\text{F}$ ,  $^{11}\text{B}$ ,  $^1\text{H}$ ,  $^{13}\text{C}$  NMR spectral analysis of compound

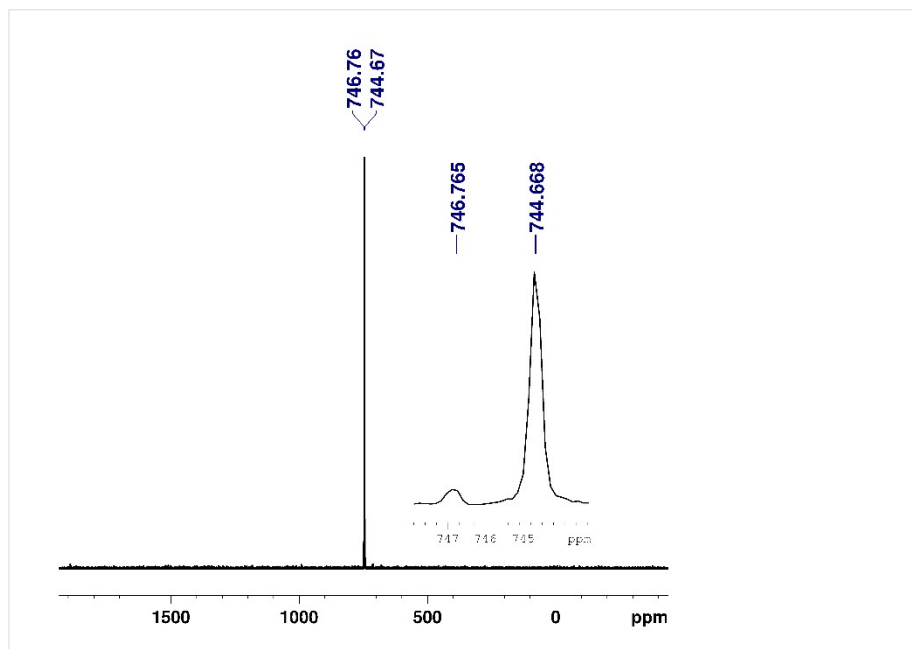

Fig.S22.  $^{125}\text{Te}$  NMR spectrum of **4** in  $\text{CDCl}_3$  at room temperature.

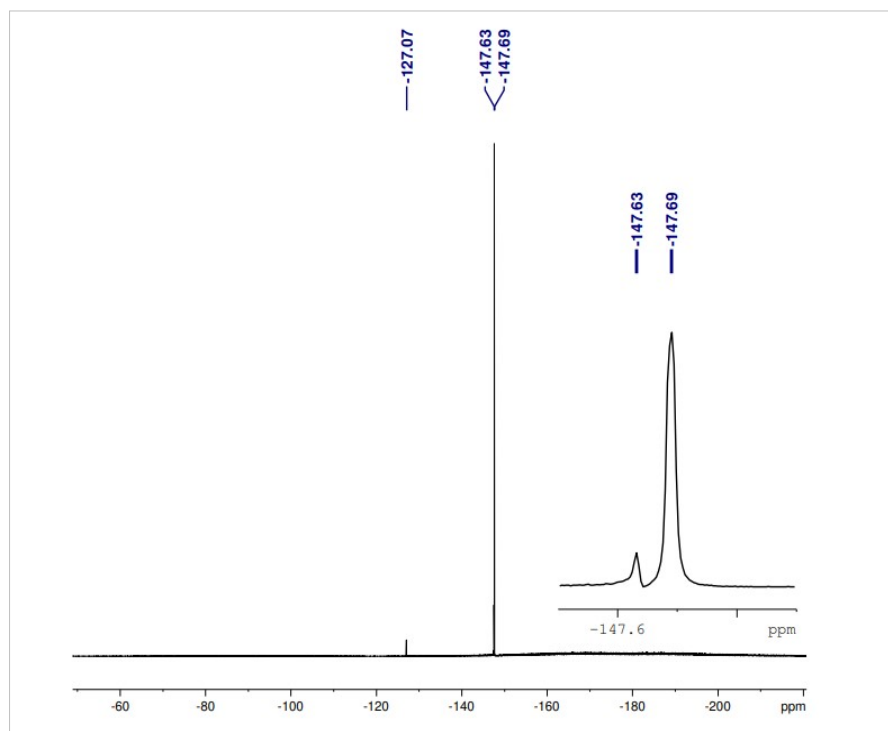

Fig. S23.  $^{19}\text{F}$  NMR spectrum of **4** in  $\text{CDCl}_3$  at room temperature.



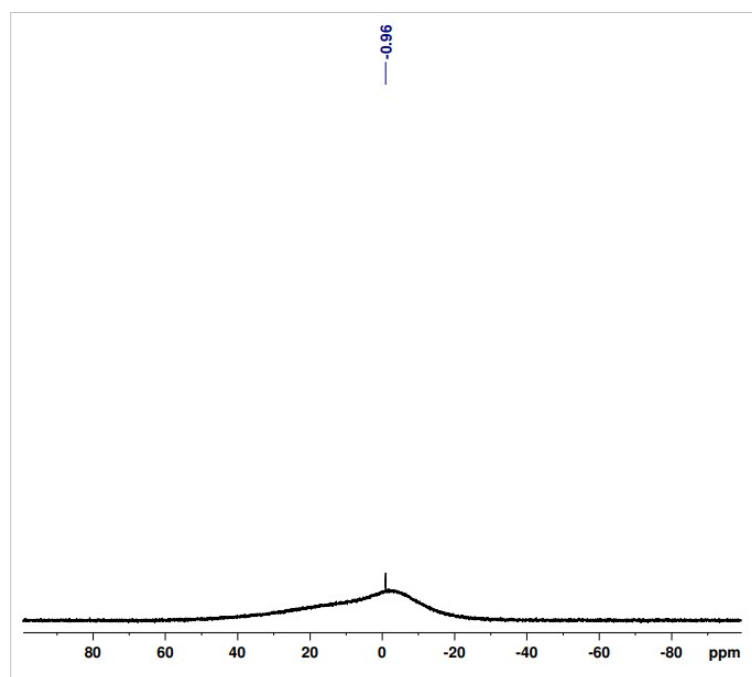

**Fig. S24.**  $^{11}\text{B}$  NMR spectrum of **4** in  $\text{CDCl}_3$  at room temperature.

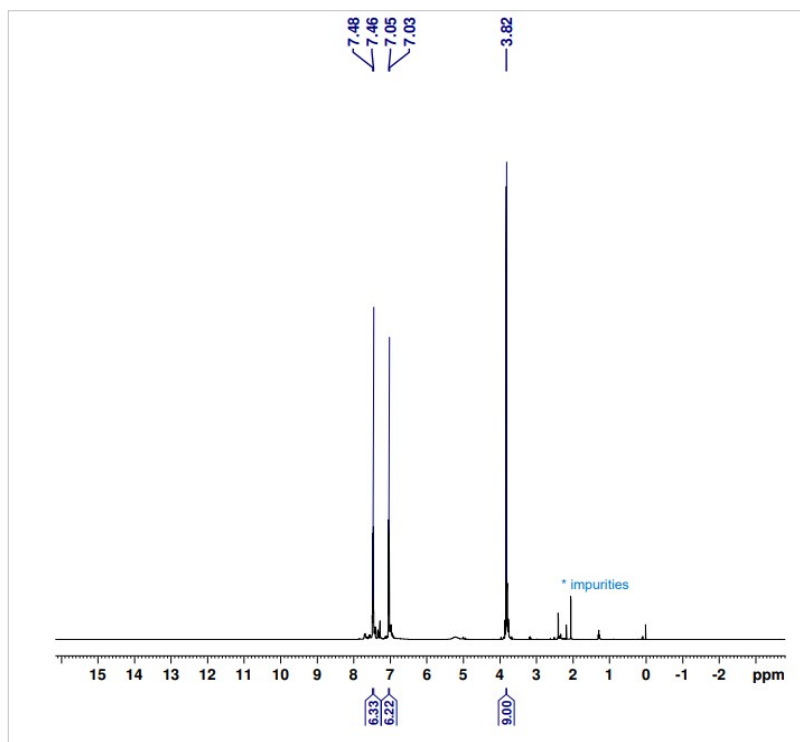

Fig. S25.  $^1\text{H}$  NMR spectrum of **4** in  $\text{CDCl}_3$  at room temperature.

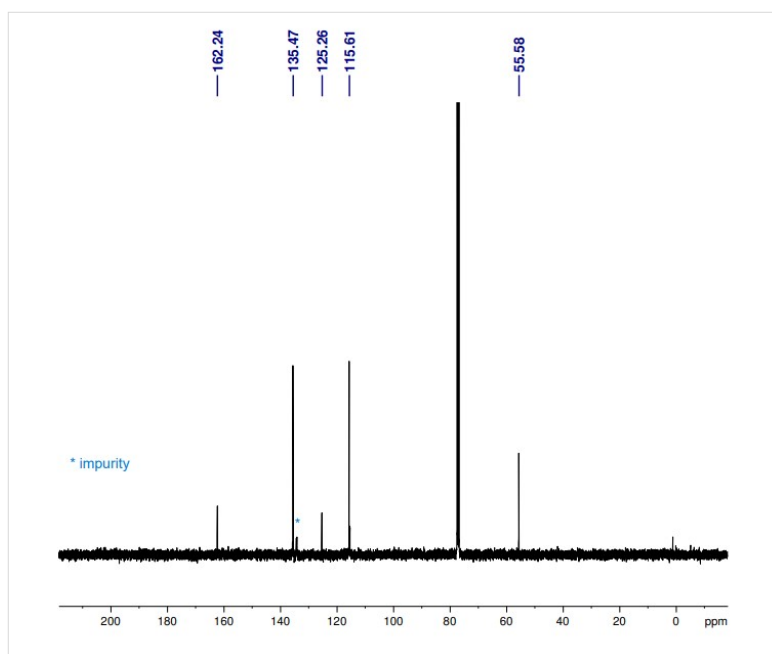

Fig. S26.  $^{13}\text{C}\{^1\text{H}\}$  NMR spectrum of **4** in  $\text{CDCl}_3$  at room temperature.

Section – 21: Powder and FT-IR spectral analysis of compound 4

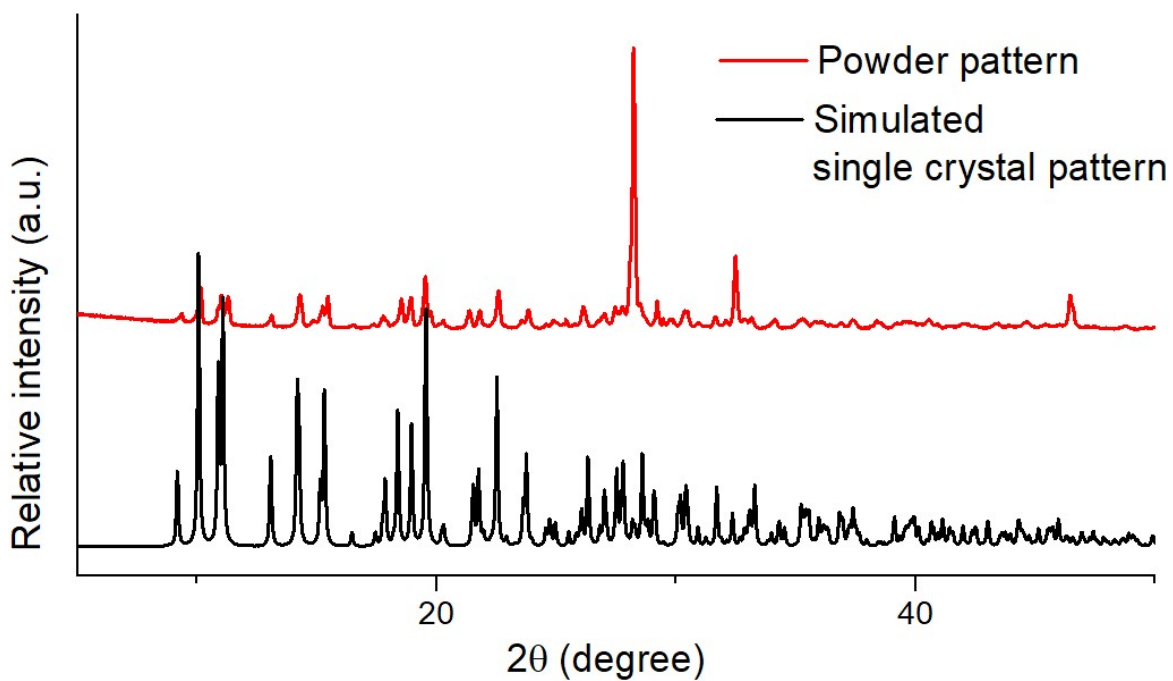

Fig. S27. Powder XRD-pattern for compound 4.

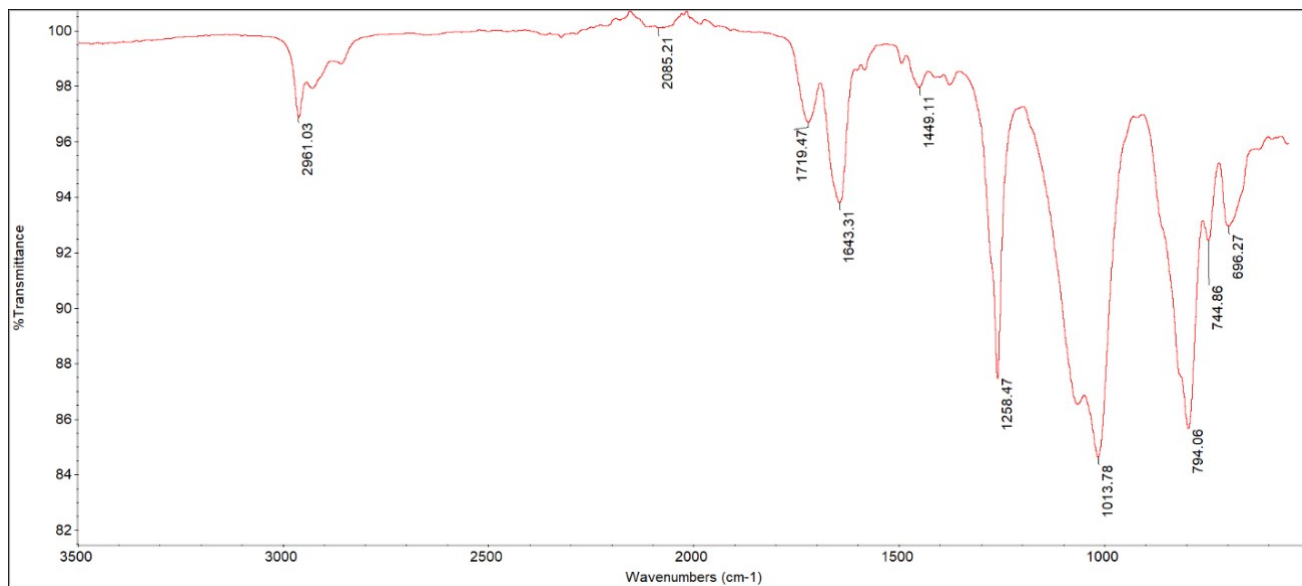

Fig. S28. IR spectrum of compound 4.

Section – 22: EDAX spectrum and elemental analysis for compound 4.

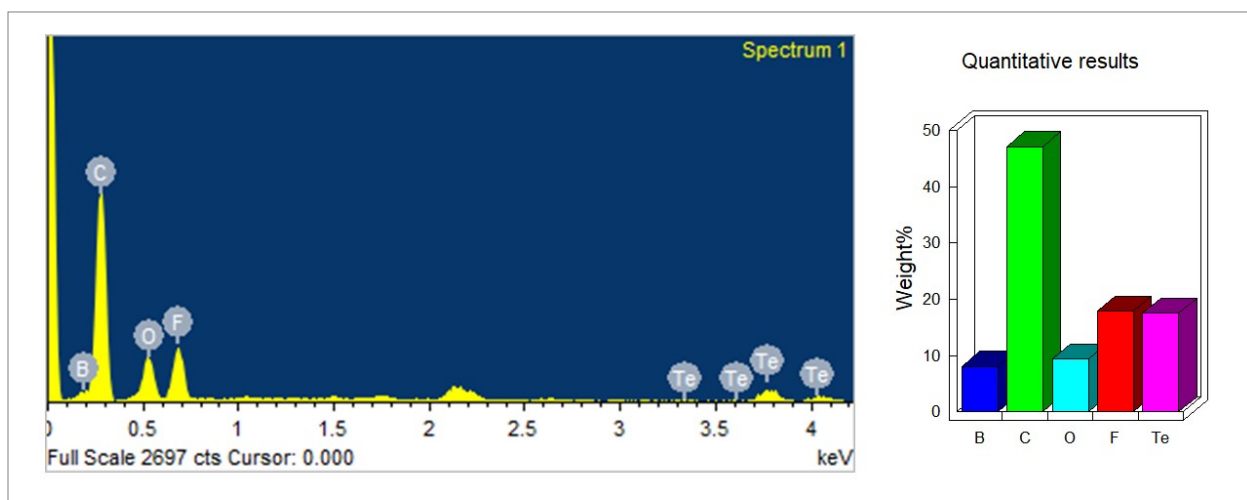

Fig. S29. EDAX spectrum of compound 4.

| Element   | Calculated Weight% | Measured weight% from EDAX analysis |
|-----------|--------------------|-------------------------------------|
| <b>B</b>  | 2.02               | 3.45                                |
| <b>C</b>  | 47.08              | 47.52                               |
| <b>O</b>  | 8.96               | 9.37                                |
| <b>F</b>  | 14.18              | 20.25                               |
| <b>Te</b> | 23.82              | 20.04                               |
| <b>H</b>  | 3.95               | Not detected                        |
|           | 100                | -----                               |

Table S10. EDAX elemental analysis of compound 4.

## Section – 23: ORTEP diagram of compound 5

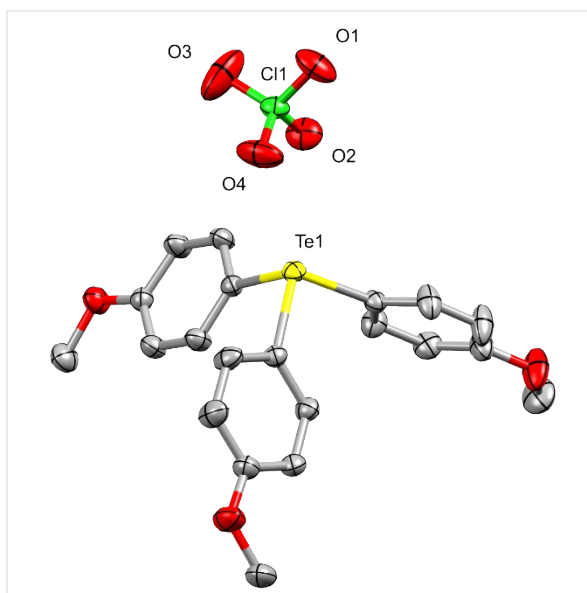

**Fig. S29.** ORTEP diagram of **5**. The thermal ellipsoids are shown at a 40% probability level. All hydrogen atoms omitted for clarity.

## Section – 24: Te-O (perchlorate) interaction distances, bond lengths and bond angles of compound 5

**Table S11.** Interactions [ $\text{\AA}$ ], selected bond lengths [ $\text{\AA}$ ] and angles [ $^\circ$ ] for **5**.

|                  |            |
|------------------|------------|
| Te(1)-O(2)       | 3.160      |
| Te(1)-C(7)       | 2.1025(16) |
| Te(1)-C(1)       | 2.1034(16) |
| Te(1)-C(15)      | 2.1190(16) |
| C(7)-Te(1)-C(1)  | 95.60(6)   |
| C(7)-Te(1)-C(15) | 95.20(6)   |
| C(1)-Te(1)-C(15) | 97.50(6)   |

## Section – 25: ESI mass spectral analysis of compound 5

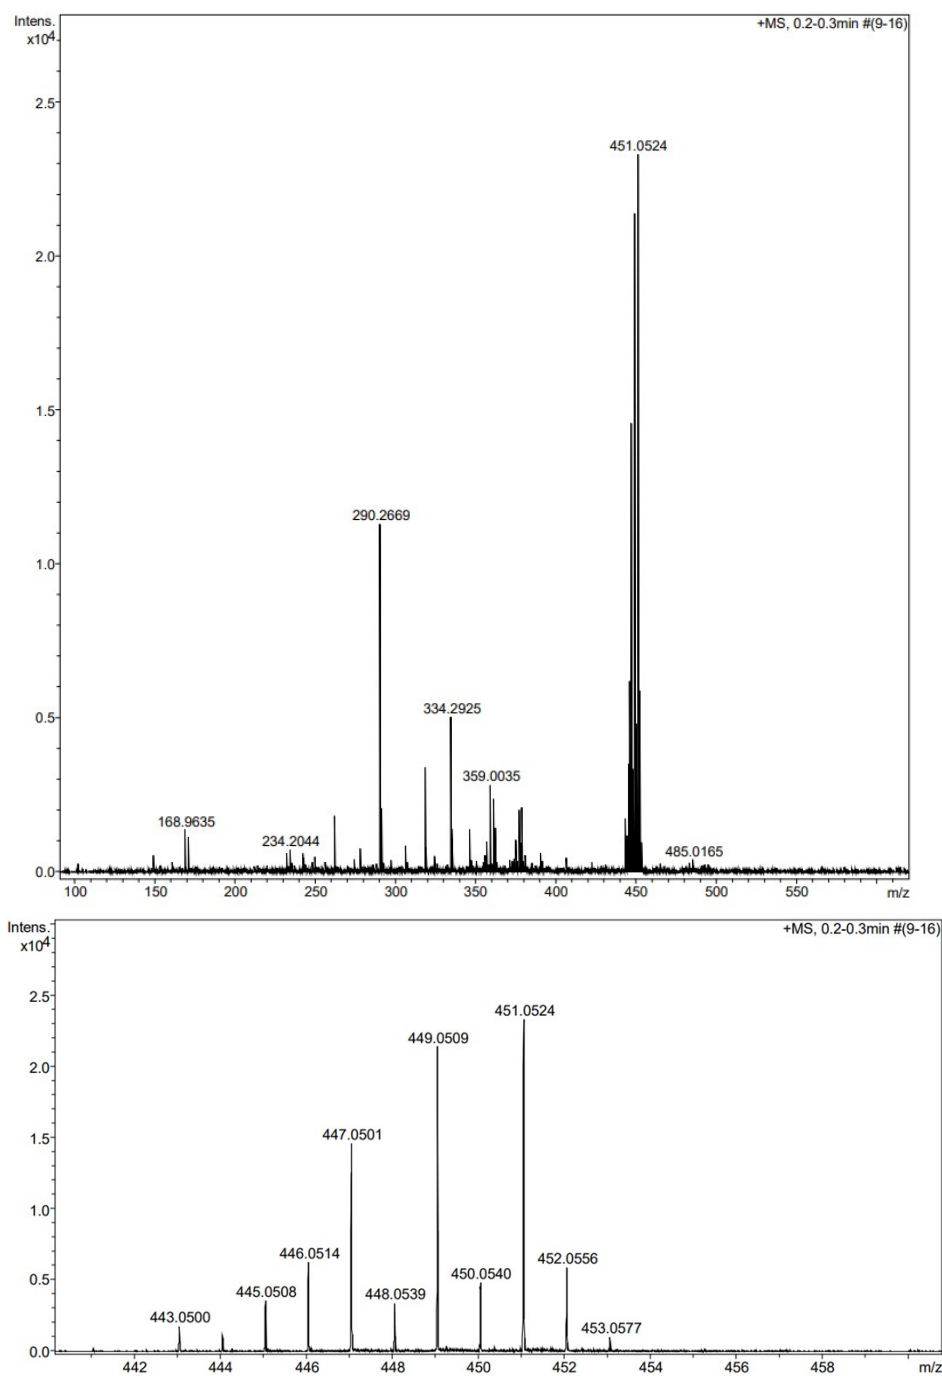

Figure S30. ESI mass spectra of 5.

Section – 26:  $^{125}\text{Te}$  NMR spectral analysis of compound 5

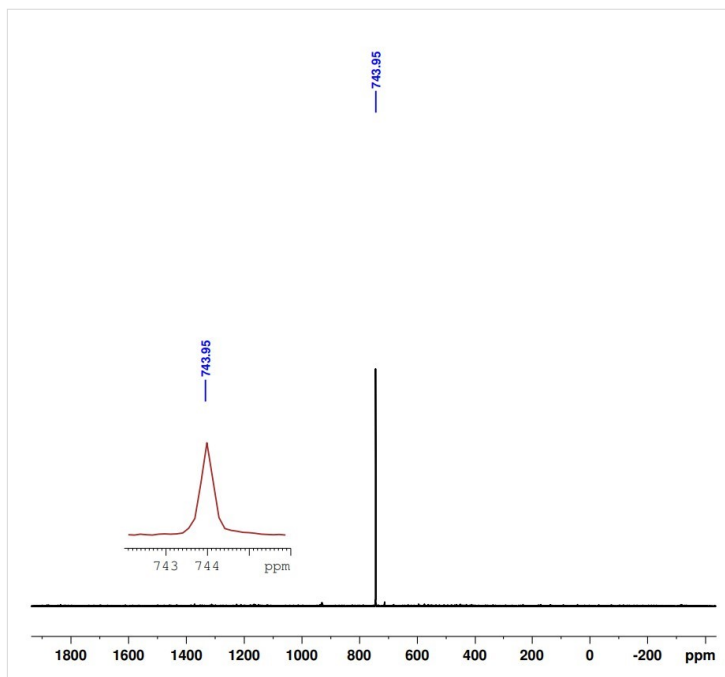

Fig. S31.  $^{125}\text{Te}$  NMR spectral analysis of compound 5

Section – 27: Powder and FT-IR spectral analysis of compound 5

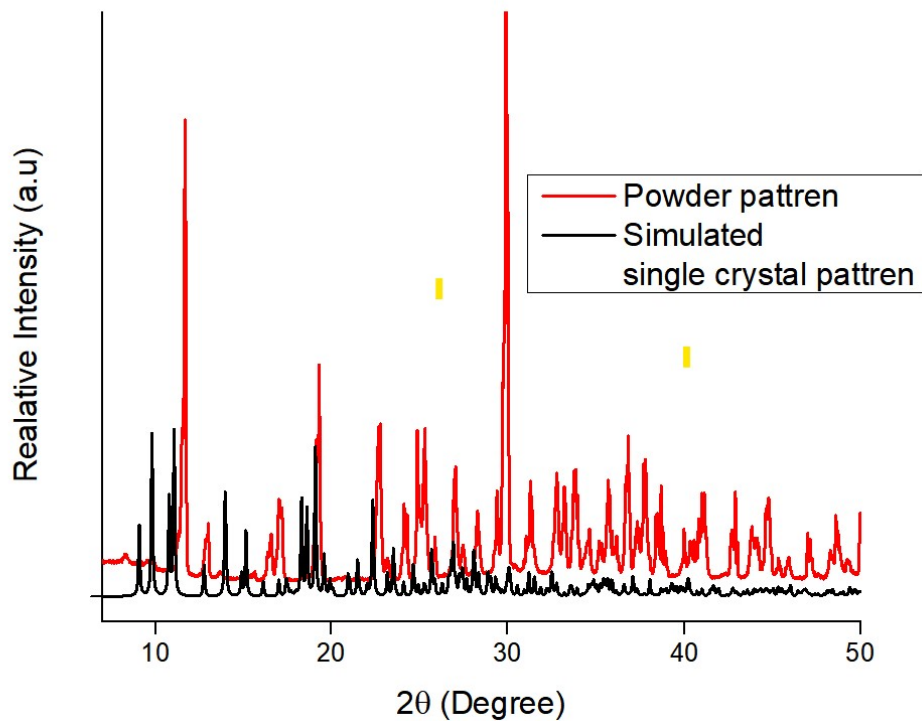

Fig. S32. Powder XRD-pattern for compound 5.

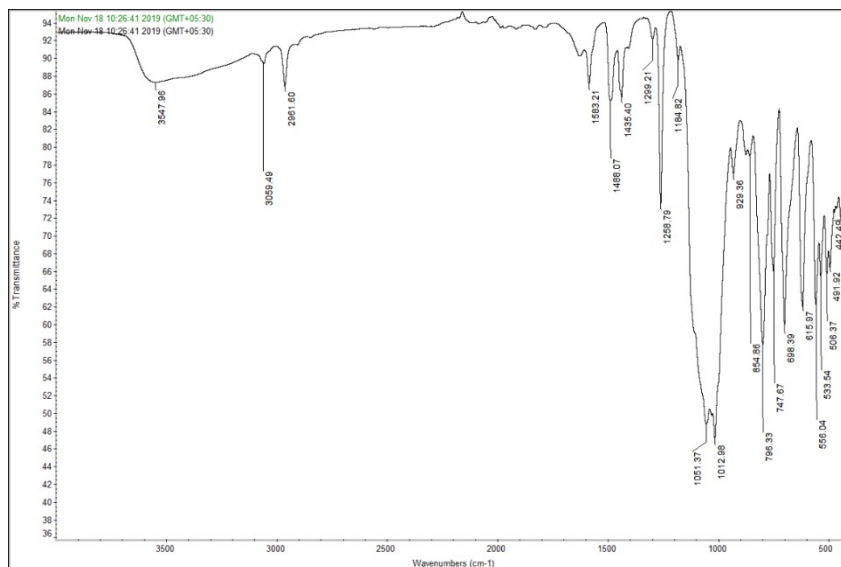

Fig. S33. FT-IR spectrum of compound 5.



Section – 28: EDAX spectrum and elemental analysis for compound 5.

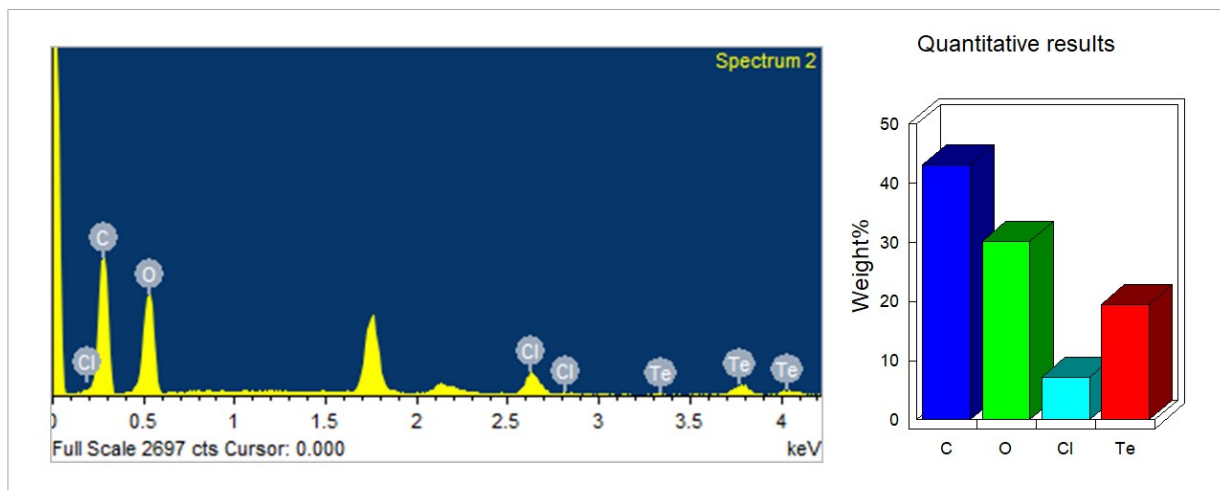

Fig. S34. EDAX spectrum of compound 2

| Element | Calculated Weight% | Measured weight% from EDAX analysis |
|---------|--------------------|-------------------------------------|
| C       | 45.99              | 45.11                               |
| O       | 20.42              | 26.19                               |
| Cl      | 6.46               | 6.20                                |
| Te      | 23.27              | 22.50                               |
| H       | 3.86               | Not detected                        |
|         | 100                | -----                               |

Table S11. EDAX elemental analysis of compound 5.

**Disclaimer:** Powder X-ray diffraction was performed to evaluate the bulk purity of the produced compounds 2-5. The small variation observed between the powder XRD data and simulated pattern may be due to the reason that the PXRD data was collected at room temperature whereas the simulated pattern is obtained from SCXRD data collected at 100 K. The SCXRD simulated powder data would also have contributions from the solvent of crystallization whereas the PXRD data was collected in samples which were kept under high vacuum, hence there could be a minor variation in the patterns observed.

The difference between the expected weight percentage and the starting stoichiometric ratio of the studied samples can be attributed to many parameters. The most significant are the time constant (Tc), acquisition time (AT), dead time (DT), work distance (WD), and acceleration voltage (AV), because they have a direct impact on energy resolution, natural width of characteristic X-ray lines, and peak intensity.<sup>1</sup>

1. J. I. Goldstein, D. E. Newbury, J. R. Michael, N. W. Ritchie, J. H. J. Scott and D. C. Joy, *Scanning electron microscopy and X-ray microanalysis*, Springer, 2017.

## Section – 29: Bond valence Sum calculation

Bond valence sum calculation. Numbers in brackets

after atom symbols are at.no., r and c -

see O'Keeffe and Brese, J.A.C.S. 1991, 113, 3226

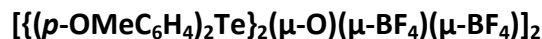

.....Te1

| Te (52, 1.40, 2.72) | Rij  | Dij  | Vij  |
|---------------------|------|------|------|
| -O ( 8, .63, 3.15)  | 2.03 | 1.94 | 1.26 |
| -C ( 6, .78, 2.00)  | 2.17 | 2.09 | 1.23 |
| -C ( 6, .78, 2.00)  | 2.17 | 2.08 | 1.26 |

Bond valence sum for Te 3.76

.....Te2

| Te (52, 1.40, 2.72) | Rij  | Dij  | Vij  |
|---------------------|------|------|------|
| -O ( 8, .63, 3.15)  | 2.03 | 1.96 | 1.20 |
| -C ( 6, .78, 2.00)  | 2.17 | 2.10 | 1.22 |
| -C ( 6, .78, 2.00)  | 2.17 | 2.07 | 1.30 |

Bond valence sum for Te 3.72

.....Te3

| Te (52, 1.40, 2.72) | Rij  | Dij  | Vij  |
|---------------------|------|------|------|
| -O ( 8, .63, 3.15)  | 2.03 | 1.96 | 1.21 |
| -C ( 6, .78, 2.00)  | 2.17 | 2.10 | 1.21 |
| -C ( 6, .78, 2.00)  | 2.17 | 2.10 | 1.22 |

Bond valence sum for Te 3.64

.....Te4

| Te (52, 1.40, 2.72) | Rij  | Dij  | Vij  |
|---------------------|------|------|------|
| -O ( 8, .63, 3.15)  | 2.03 | 1.95 | 1.24 |
| -C ( 6, .78, 2.00)  | 2.17 | 2.11 | 1.17 |
| -C ( 6, .78, 2.00)  | 2.17 | 2.07 | 1.31 |

Bond valence sum for Te 3.7

**[{(p-OMeC<sub>6</sub>H<sub>4</sub>)<sub>2</sub>Te}<sub>2</sub>(μ-O)(μ-ClO<sub>4</sub>)(μ-ClO<sub>4</sub>)]<sub>2</sub>**

.....Te1

| Te (52, 1.40, 2.72) | Rij  | Dij  | Vij  |
|---------------------|------|------|------|
| -O ( 8, .63, 3.15)  | 2.03 | 1.95 | 1.24 |
| -C ( 6, .78, 2.00)  | 2.17 | 2.10 | 1.22 |
| -C ( 6, .78, 2.00)  | 2.17 | 2.11 | 1.18 |

Bond valence sum for Te 3.64

.....Te2

| Te (52, 1.40, 2.72) | Rij  | Dij  | Vij  |
|---------------------|------|------|------|
| -O ( 8, .63, 3.15)  | 2.03 | 1.96 | 1.20 |
| -C ( 6, .78, 2.00)  | 2.17 | 2.10 | 1.21 |
| -C ( 6, .78, 2.00)  | 2.17 | 2.08 | 1.27 |

Bond valence sum for Te 3.69

.....Te3

| Te (52, 1.40, 2.72) | Rij | Dij | Vij |
|---------------------|-----|-----|-----|
|---------------------|-----|-----|-----|

-O ( 8, .63, 3.15) 2.03 1.94 1.26

-C ( 6, .78, 2.00) 2.17 2.10 1.20

-C ( 6, .78, 2.00) 2.17 2.09 1.24

Bond valence sum for Te 3.70

.....Te4

Te (52, 1.40, 2.72)                      Rij    Dij    Vij

-O ( 8, .63, 3.15) 2.03 1.97 1.17

-C ( 6, .78, 2.00) 2.17 2.09 1.25

-C ( 6, .78, 2.00) 2.17 2.10 1.20

Bond valence sum for Te 3.63

**(p-OMeC<sub>6</sub>H<sub>4</sub>)<sub>3</sub>TeBF<sub>4</sub>**

.....Te1

Te (52, 1.40, 2.72)                      Rij    Dij    Vij

-C ( 6, .78, 2.00) 2.17 2.10 1.20

-C ( 6, .78, 2.00) 2.17 2.10 1.20

-C ( 6, .78, 2.00) 2.17 2.12 1.15

Bond valence sum for Te 3.56

**(p-OMe C<sub>6</sub>H<sub>4</sub>)<sub>3</sub>TeClO<sub>4</sub>**

.....Te1

Te (52, 1.40, 2.72)                      Rij    Dij    Vij

-C ( 6, .78, 2.00) 2.17 2.10 1.19

-C ( 6, .78, 2.00) 2.17 2.10 1.19

-C ( 6, .78, 2.00) 2.17 2.12 1.14

Bond valence sum for Te 3.53

.....The End.....
